# Supplementary material
Source: MDPI journal article supplement (https://www.mdpi.com/2073-4352/14/1/98)
Supplement: s1 [file s1]

# Investigating the competitive factors of metal-anion coordination, coordination by water, and hydrogen bonding in complexes of cyanuric acid with the alkaline earth metals

William Clegg and Gary S. Nichol

## Supplementary material

**Table S1: CSD REFCODES for CYH and its solvates and cocrystals**

AGEREJ  
AGERIN  
AGEROT  
AGEROT01  
AMIGUA  
BADCUR  
BULLEB  
BUVLEM  
CYURAC03  
CYURAC04  
CYURAC05  
CYURAC10  
CYURAC12  
CYURAC13  
CYURAC14  
CYURAC15  
HADKUT  
HADKUT01  
HIQZOY  
HOPJOM  
ILECAG  
IQUKUD  
IQULAK  
IZIHEE  
JAGPEQ  
JAGPIU  
JAGPOA  
JAGPOA01  
JAGPUG  
JAGQAN  
JAGQAN01  
JAGQER  
JAGQIV  
JAGQIV01  
JAGQOB  
JAGQOB01

JOLSAE  
KEMWUU  
KIRGIF  
KIRGOL  
LEPKOH  
MOPYAR  
MOXNAR  
NONYOH  
OYAPOW  
OYAPUC  
OYEJOU  
PANVUV  
PAVDID  
PAVDOJ  
PAVDUP  
QACSUI  
QACSUI01  
QACSUI02  
QACSUI03  
QAGDEK  
TEBREZ  
TEBRID  
UCUSIY  
UFOGOP  
VEDFAM  
VEXQOE  
VEXQUK  
XAKSOU  
XAKSUA  
XANVER  
XASWUN  
XENFAB  
XENFAB01  
XEPZID  
XURGID  
XURGOJ  
YIWBOV  
YIZWUA  
YIZXAH  
YIZXEL  
YIZXIP  
YIZXOV  
ZAHJIB  
ZAHJIB01  
ZAHJIB02  
ZAHJIB03  
ZAHJIB04

**Table S2: CSD REFCODES for organic salts of CY<sup>-</sup>**

BUHMAU  
CIHHUX  
DIRNUP  
IDIDUX  
KADMAG  
KADMEK  
KADMIO  
KADMOU  
KADMUA  
KADNAH  
KADNEL  
KAYSOT  
KEDYUO  
LAFLOV  
MOHCUI  
MOPYEV  
MOPYEV01  
POHFAW  
QAGDAG  
QAGQAT  
QELXEL  
TUBMOV  
WEGTAE  
WEYCEM  
XASWUN  
XORMOH

**Table S3: CSD REFCODES for cyanurate complexes of transition and post-transition metals**

AYOBIC  
AYOBOI  
AZIYEQ  
BIPYEG  
CENKUC  
DACMIH  
DOKFOZ  
DOVTEN  
DUCJOA  
DUCJOA01  
DUCJOA10  
EDEREK  
EMEWEB  
FETGAM  
FETGAM01  
FETGIU  
FETGIU01  
HASQIF

HIGMIU  
HILKIX  
HOLFIX  
HOPZAQ  
HOPZEU  
ICOREX  
ICYUCU  
ICYUCU01  
IDOGUH  
IQEYUB  
IYUGAM  
JEDGOS  
JOKKAX  
JOXZOO  
JOXZOO01  
JUGMEG  
KARDEM  
KARDIQ  
KEQGIW  
KEQGIW01  
KOKVAI  
KUXFAK  
KUXFAK01  
KUXFAK02  
MAXMAD  
MIPCEX  
MIRGEB  
MIRGIF  
MIRGOL  
NECTEU  
NECTIY  
NECTIY01  
NECTIY02  
NECTIY03  
NECTIY04  
NECTIY05  
NECTIY06  
NECTIY07  
NECTIY08  
NECTIY09  
NECTOE  
NECTUK  
NIDDOV  
RADNIX  
RADNOD  
SIBBEK  
SUQCEN  
SUQCIR  
TAQWIR  
TESZOJ

TOSQAV  
TUDQAN  
TUDQER  
TUDQIV  
UKIFAV  
VEZJAP  
WEYMUJ  
WICCIV  
XILLEK  
XIXQOO  
XIXQUU  
ZETDOR

**Table S4: CSD REFCODES for cyanurate complexes of alkali metals**

CUQTIU  
CUQTIU01  
DODTEY  
DODTEY01  
FUSMIS  
FUSMIS01  
GONPIL  
GONPOR  
GONPOR01  
GUMZAS  
ILECAG  
IQUKOX  
IQUKUD  
IQULAK  
JOKKAX  
KOJJAX  
KOJJEB  
KOJJIF  
KOJJOL  
KUTFAI  
KUTFEM  
LEPKIB  
LEPKIB01  
LEPKOH  
LIZQOD  
LIZQUJ  
LOVBOQ  
NOMSIU  
NOMSOA  
OYANUA  
RONLUE  
RONLUE01  
UCUSIY  
VOKKIP  
VOKKIP01

VOKKIP02  
WIVSAY  
XIBPII  
XIBPII01  
XIBPII02

**Table S5: CSD REFCODES for cyanurate complexes of alkaline earth metals.**

FUSMEO  
FUSMEO01  
VUQVUB  
VUQVIP  
YIWBOV  
YIWBOV01  
ZACZEM  
QEHKOG  
QEHKOG01  
VUQTOT  
VUQTOT01  
VUQTOT02  
OYEJUA  
VUQTIN  
GONNEF  
GONNUV  
VUQVOV  
GONPEH  
YOZREM  
YOZREM01  
YOZREM02  
UPECAU  
UPECAU01  
UPECAU02  
XENFEF  
GONPAD  
SIXKAO  
SOVMAU  
HIJSEB  
HIJTAY  
YOKYUV
